# Supplementary material for: High resolution UHPLC-MS characterization and isolation of main compounds from the antioxidant medicinal plant Parastrephia lucida (Meyen)
Source: PubMed Central journal article supplement — Saudi Pharm J. 2017 Mar 14;25(7):1032–9. doi: 10.1016/j.jsps.2017.03.001 (PMC5681312; doi:10.1016/j.jsps.2017.03.001), 2017-03-14

**Supplementary material for the article: High resolution UHPLC-MS characterization and isolation of main compounds from the antioxidant medicinal plant *Parastrephia lucida* (Meyen)**

Figure S1. HSCCC chromatogram of *P. lepidophylla* ethanolic extract at 254 nm.

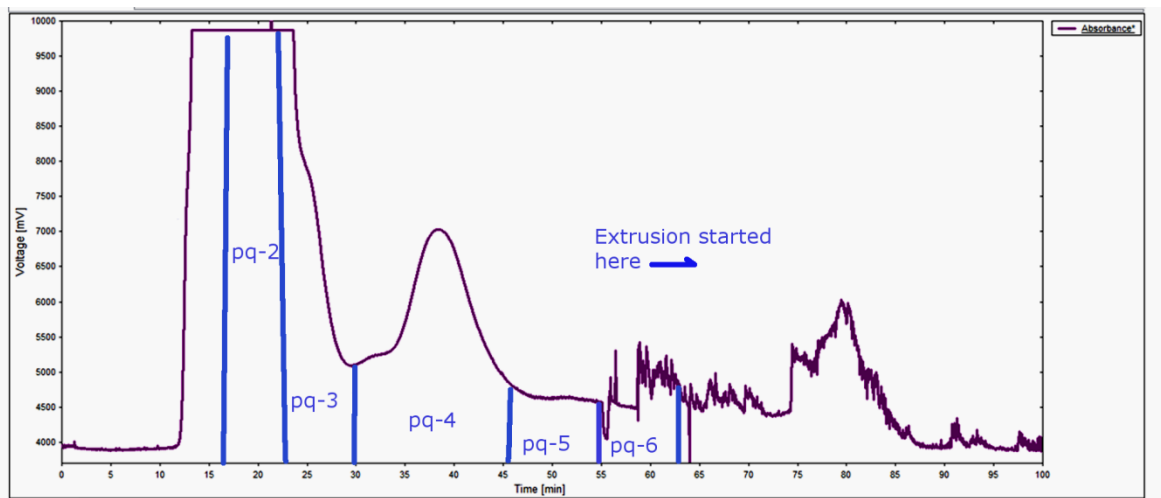



Figure S3.  $^{13}\text{C}$  NMR (100.25 MHz) spectrum of 11-p-coumaroyoxytremetone (peak 35).

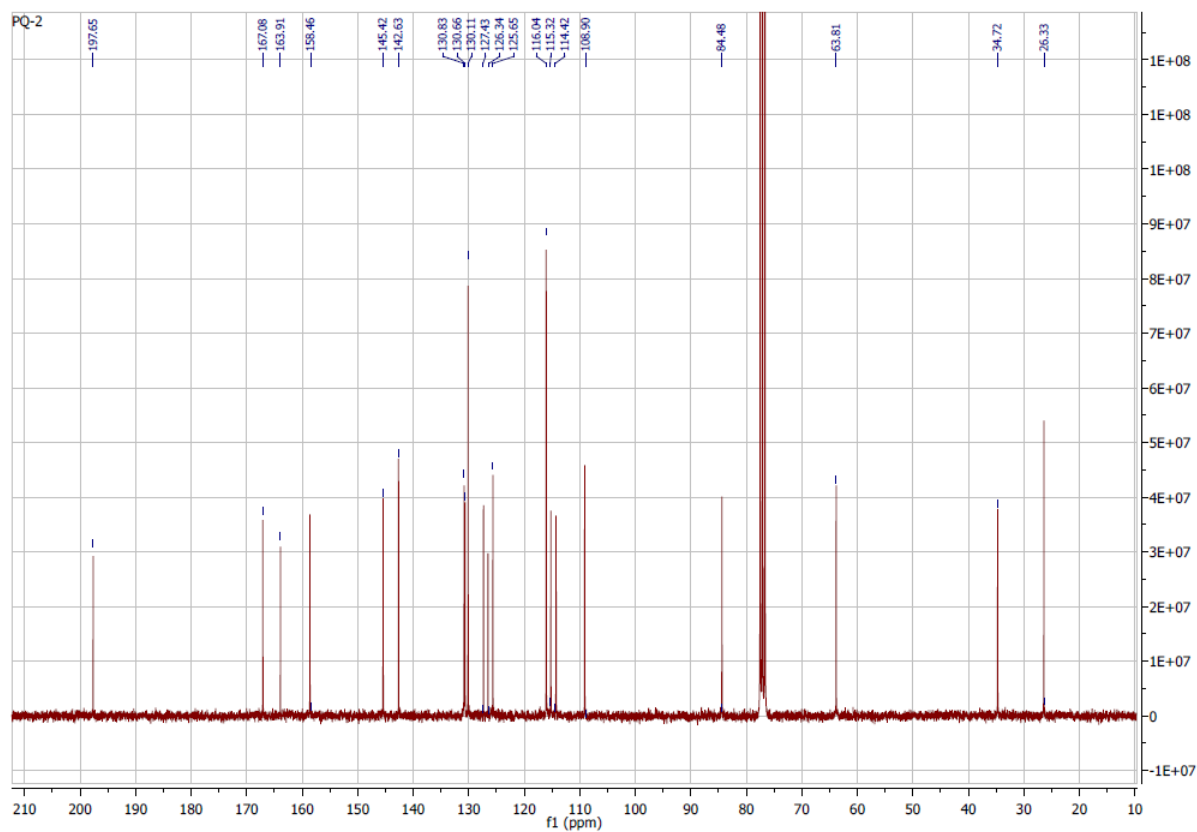

Figure S4. HSQC spectrum of 11-p-coumaroyoxytremetone (peak 35).

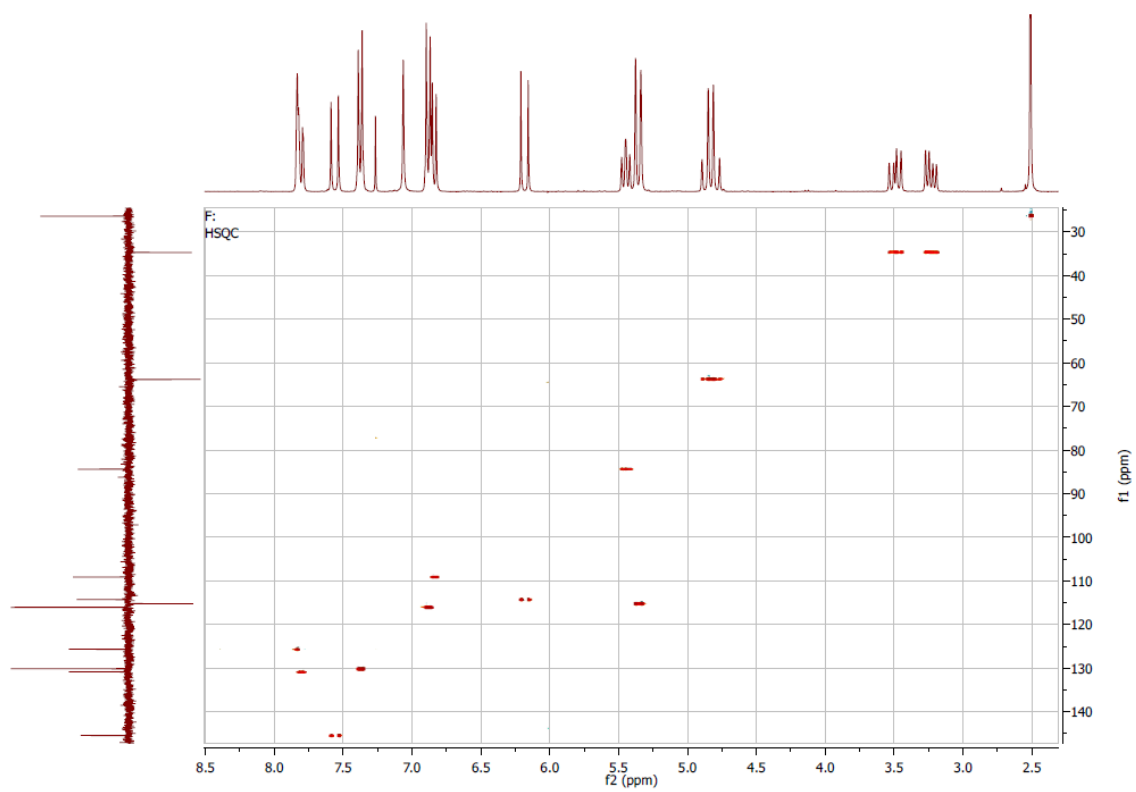

Figure S5. HMBC spectrum of 11-p-coumaroyoxytremetone (peak 35).

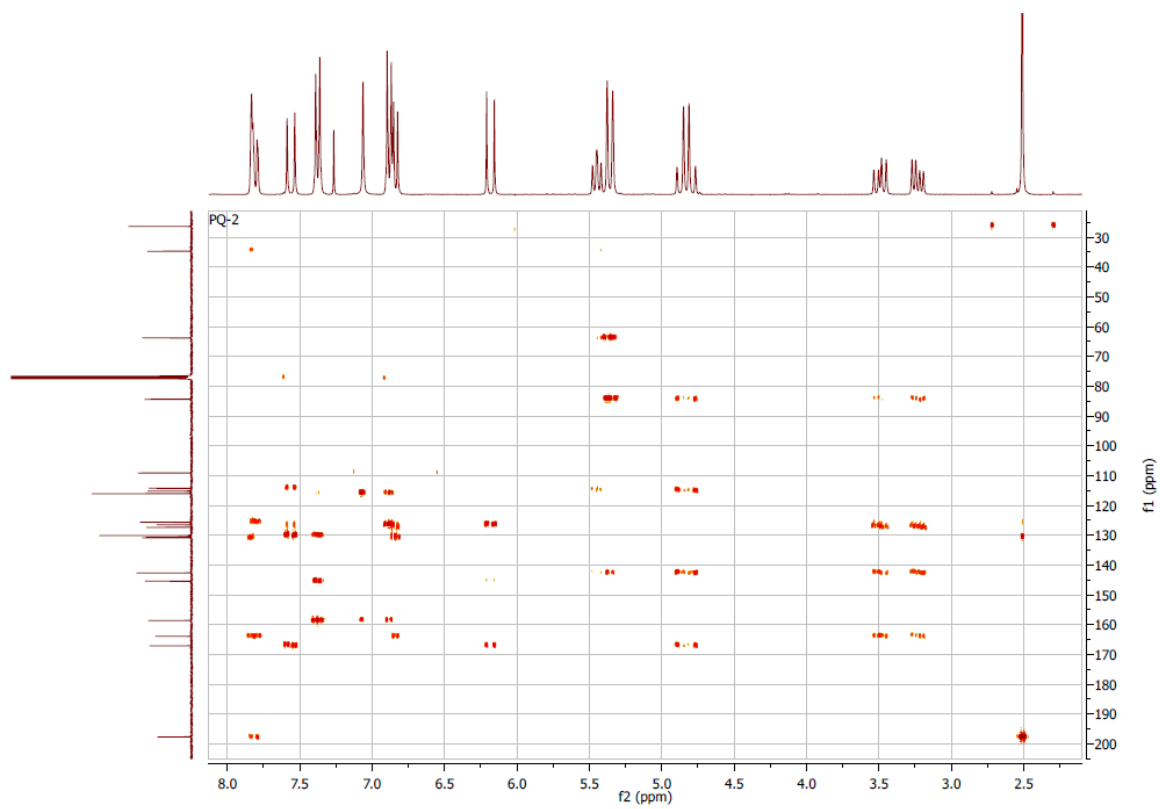

Figure S6.  $^1\text{H}$  NMR (300 MHz) spectrum of s bacchalineol A (peak 42).

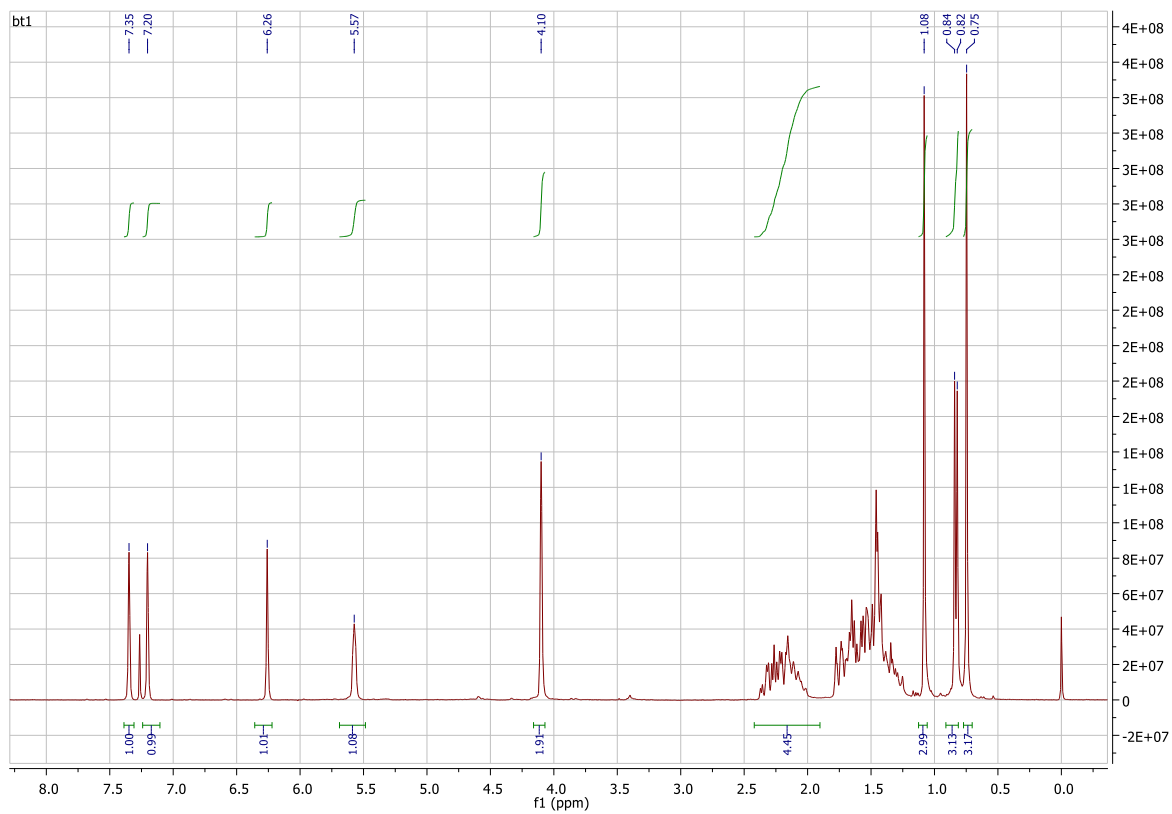

Figure S7.  $^{13}\text{C}$  NMR (100.25 MHz) spectrum of bacchalineol A (peak 42).

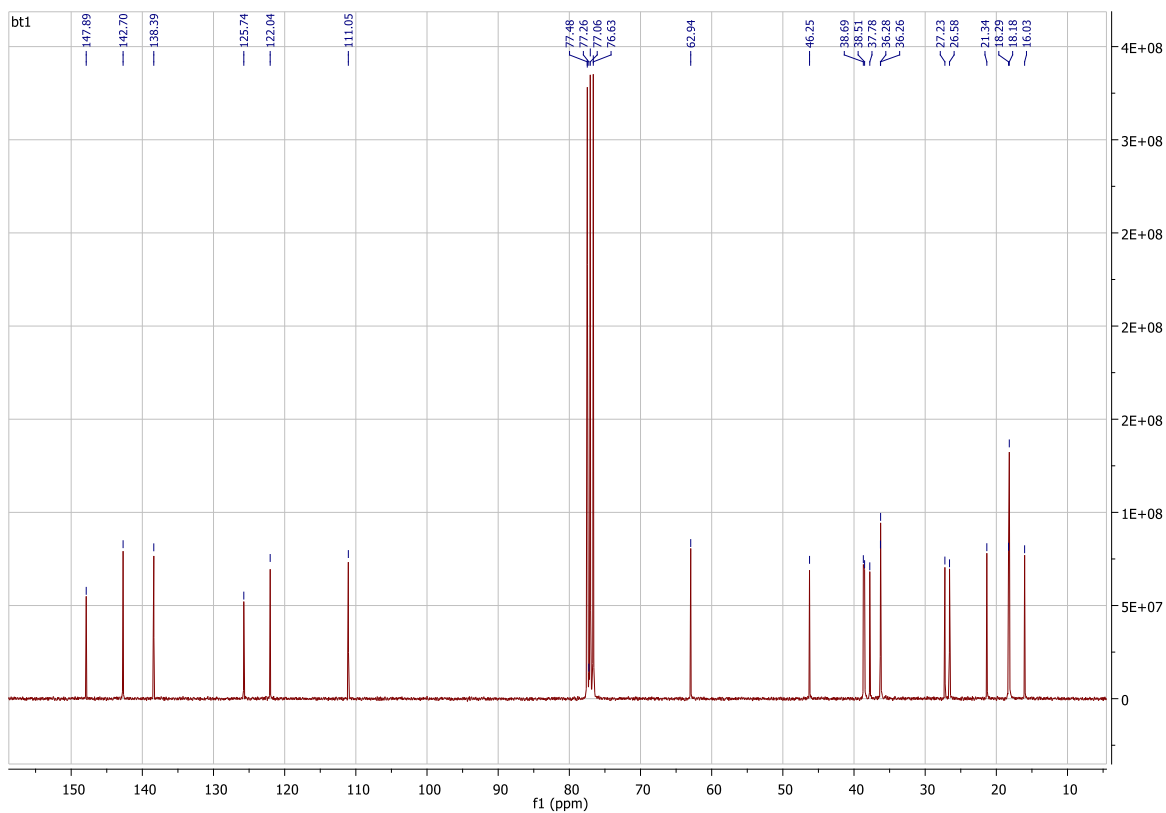

Figure S8. HMBC spectrum of bacchalineol A (peak 42).

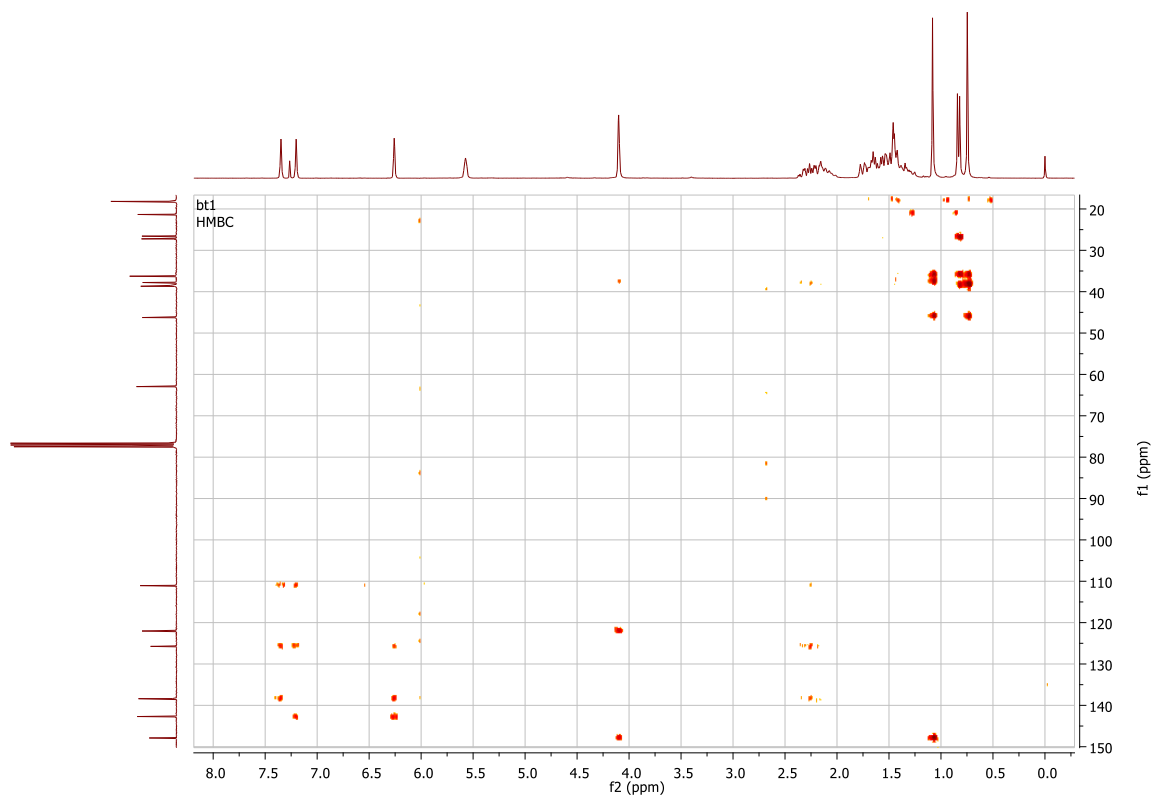



Figure S9. HSQC spectrum of bacchalineol A (peak 42).

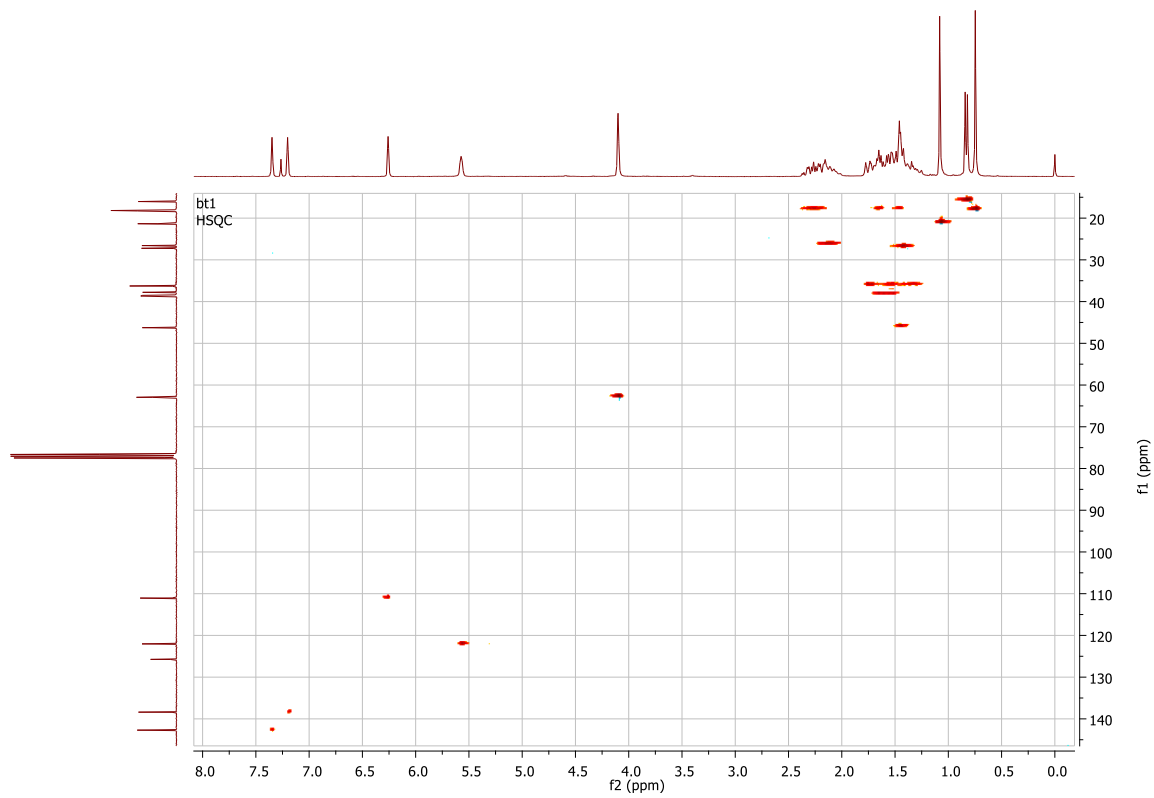

Fig S10. Full HR-MS spectra of peaks 18,19, 24, 28, 32, 35 and 36.

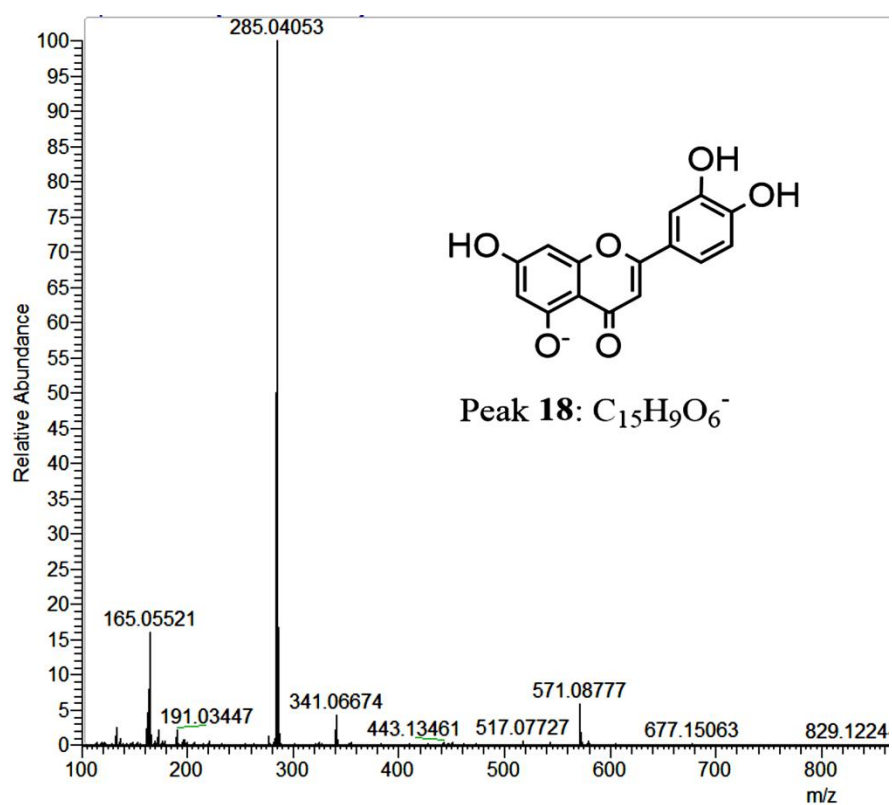

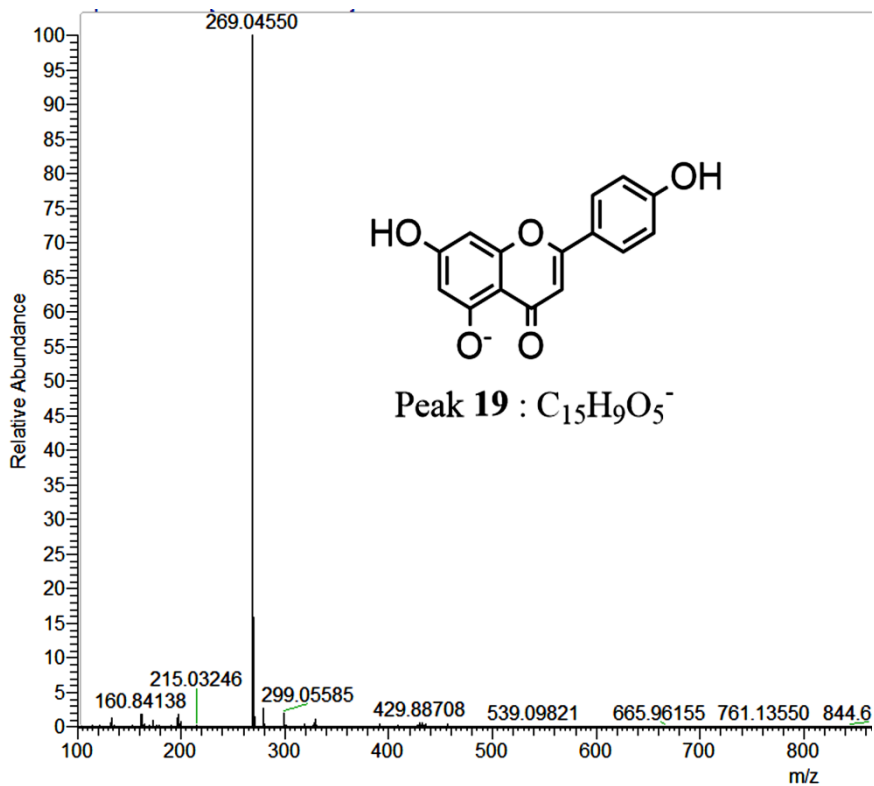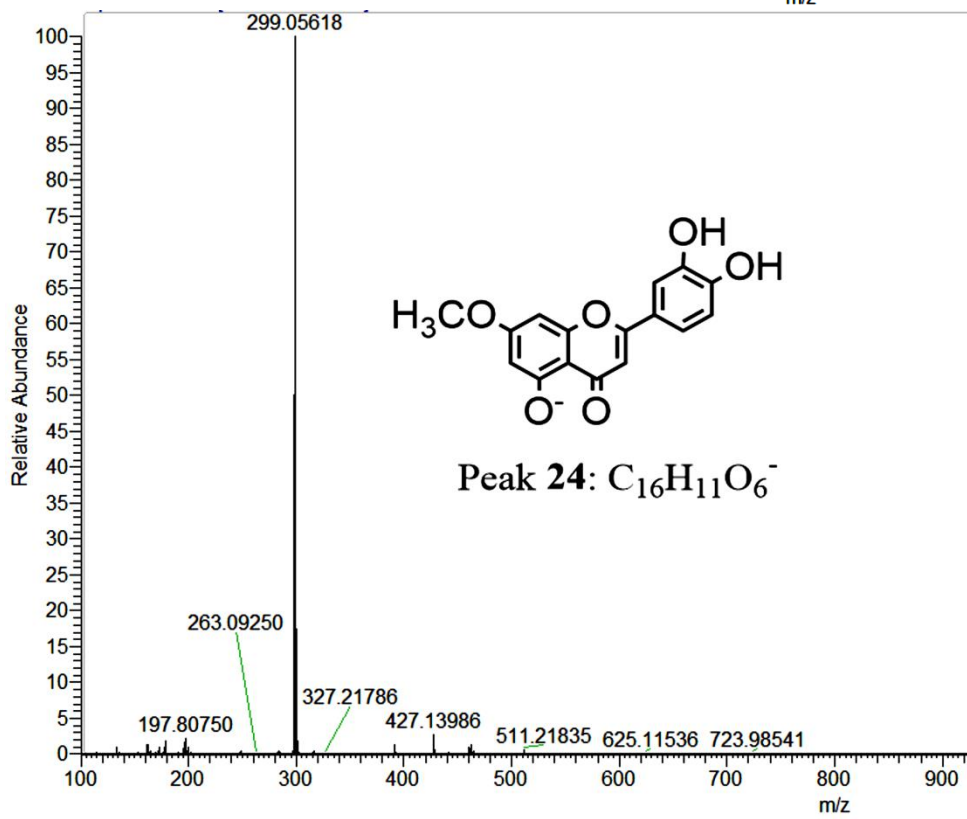

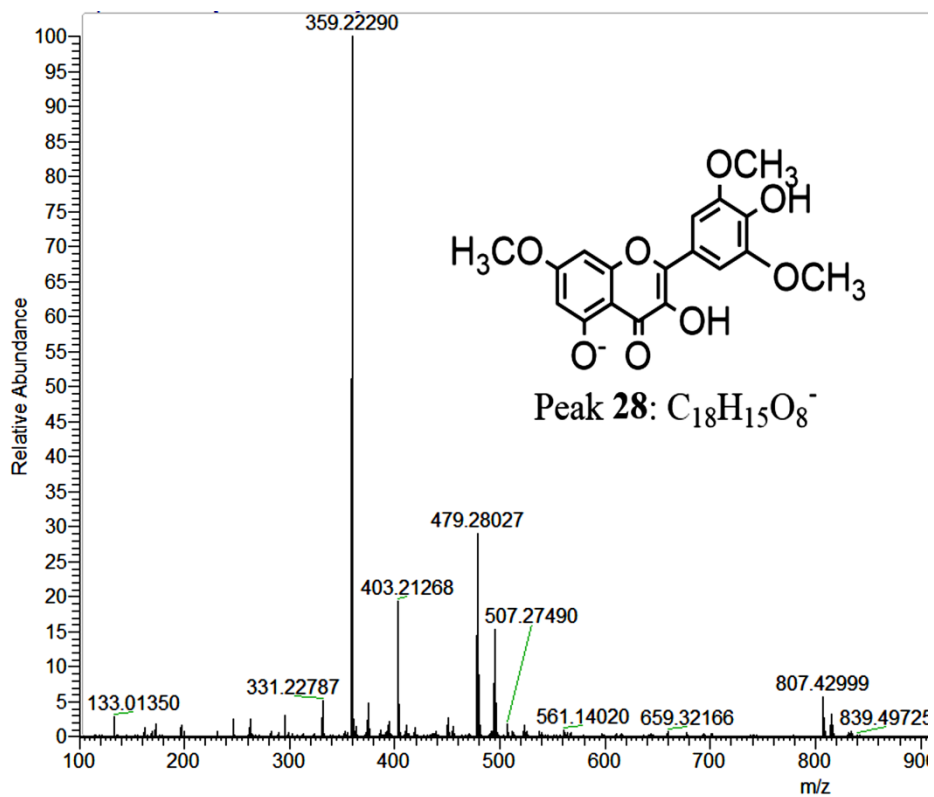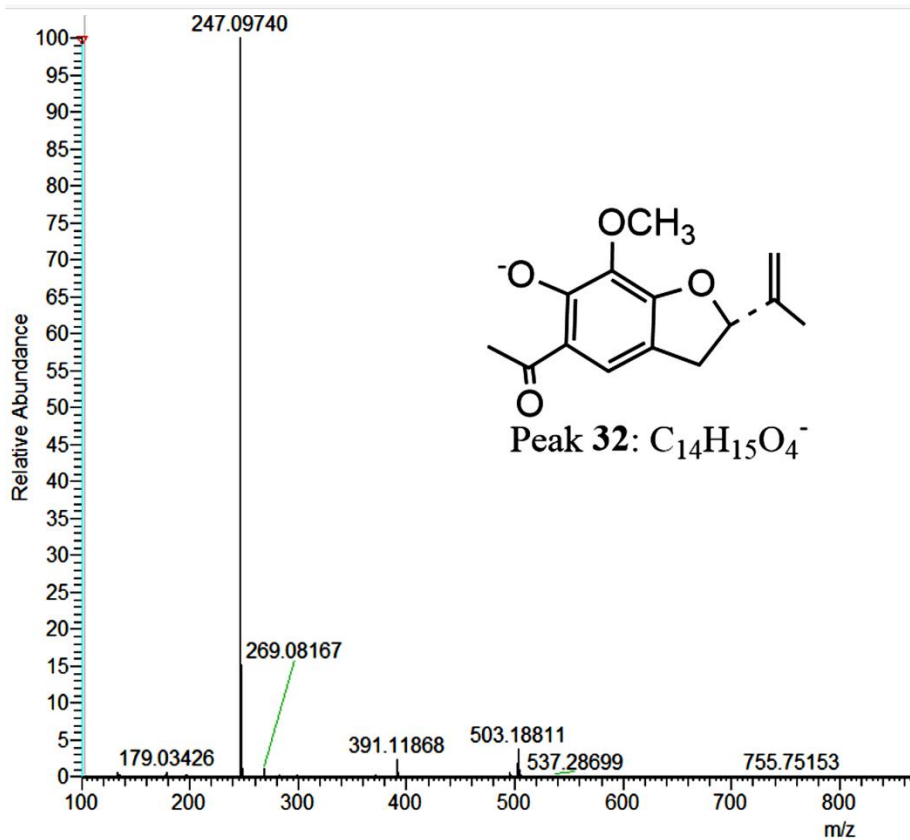

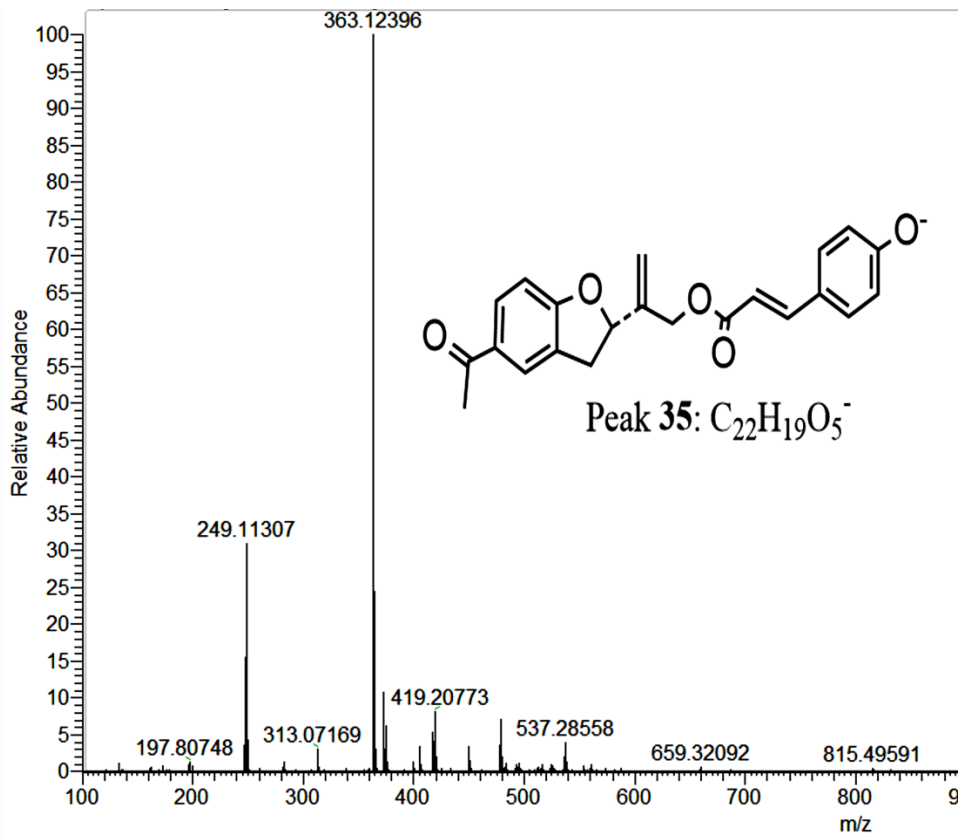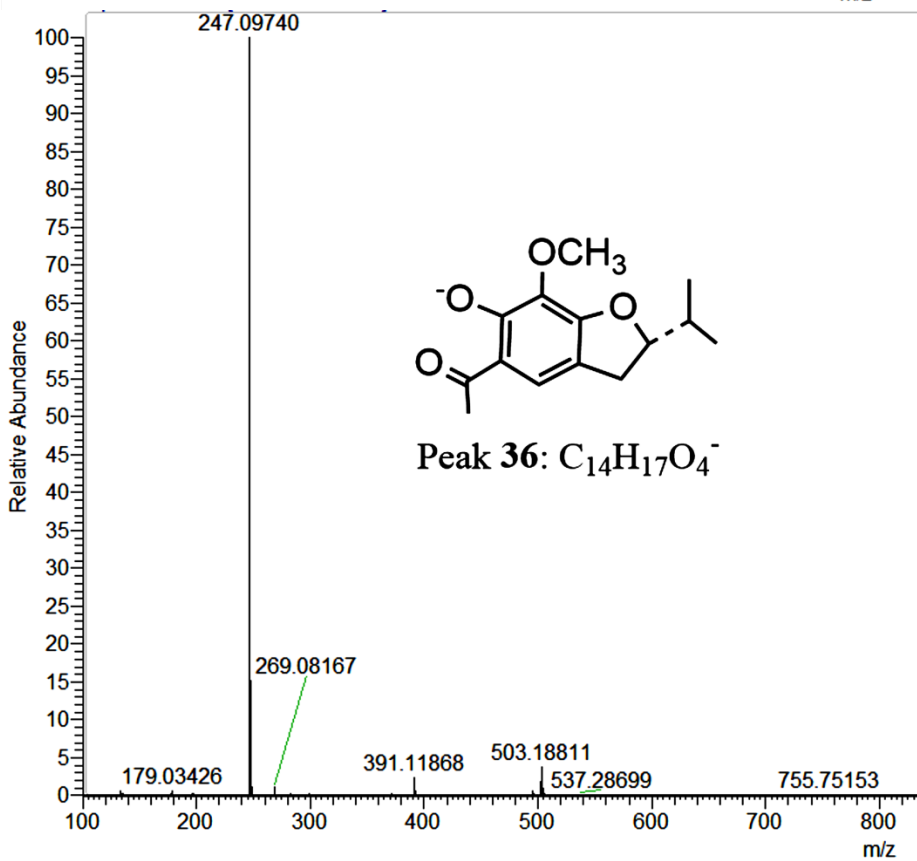



Fig. S11. Proposed biosynthetic pathways for the flavonoid derivatives.

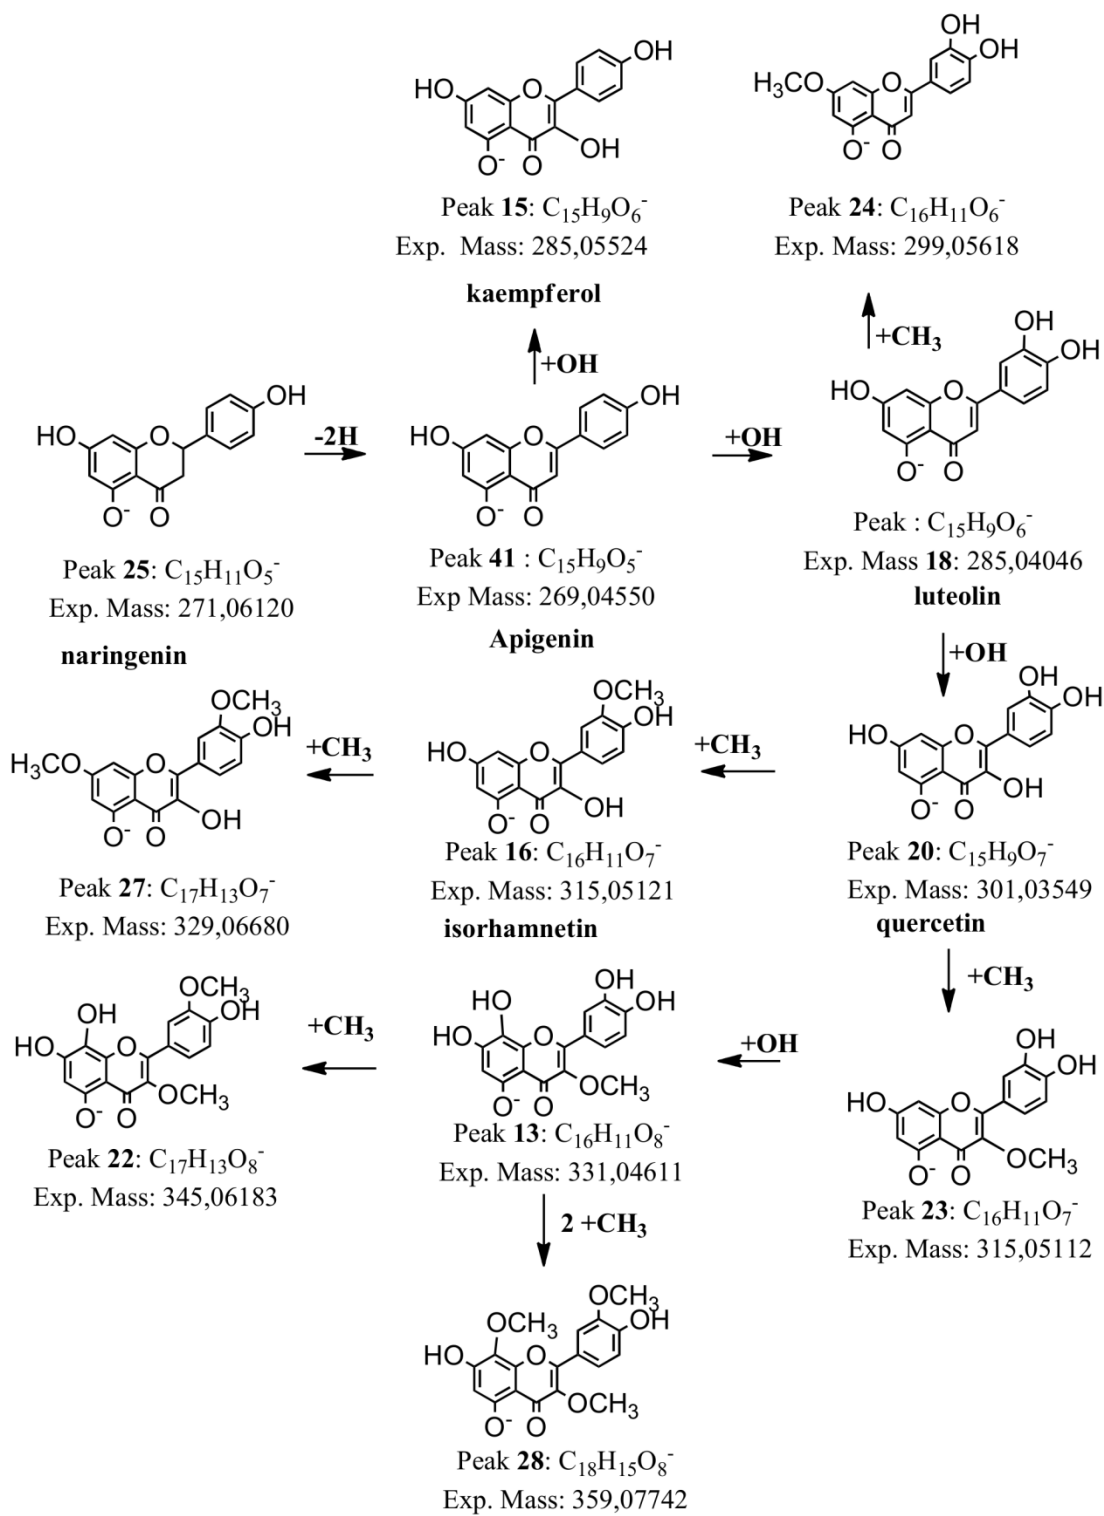

Fig. S12. Proposed biosynthetic relationships for the phenolic acid or coumarin derivatives.

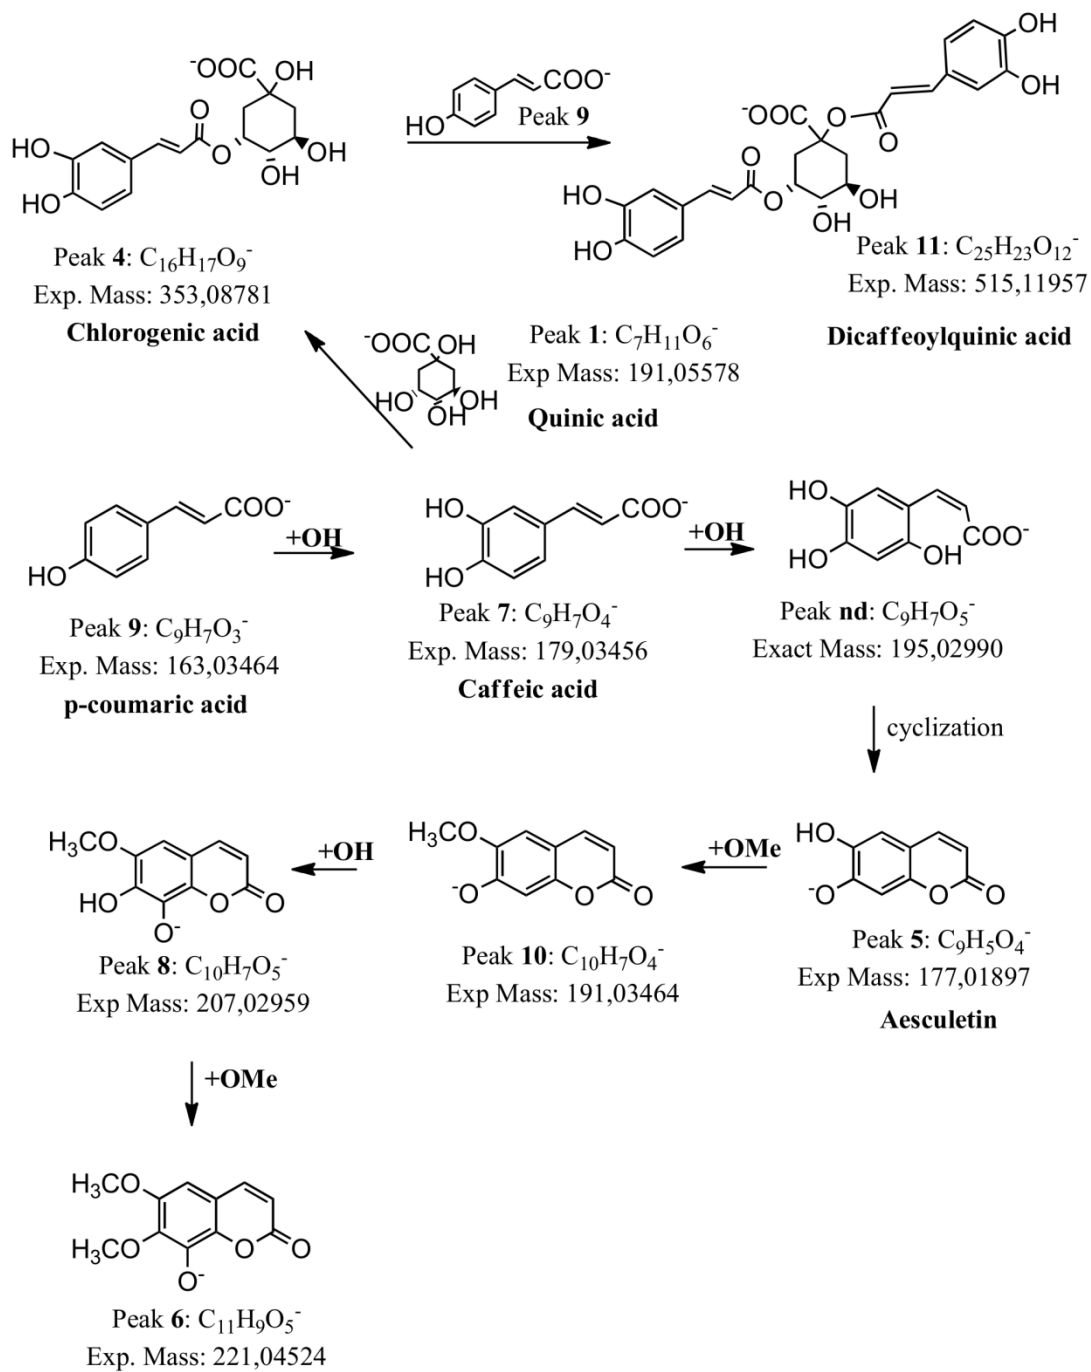

Supplement: mmc1.pdf [file mmc1.pdf]
